# Supplementary material
Source: PubMed Central journal article supplement (PMC5971458)
Supplement: supp_RA118.002270_135807_1_supp_106919_p6cp64.pdf [file supp_RA118.002270_135807_1_supp_106919_p6cp64.pdf]

**TOR complex 2 is required for chromatin-mediated gene silencing and assembly of heterochromatic domains at subtelomeres**

Adiel Cohen, Aline Habib, Dana Laor, Sudhanshu Yadav, Martin Kupiec and Ronit Weisman

**Supporting information**

Figure S1

Figure S2

Figure S3

Figure S4

Figure S5

Table S1

Table S2

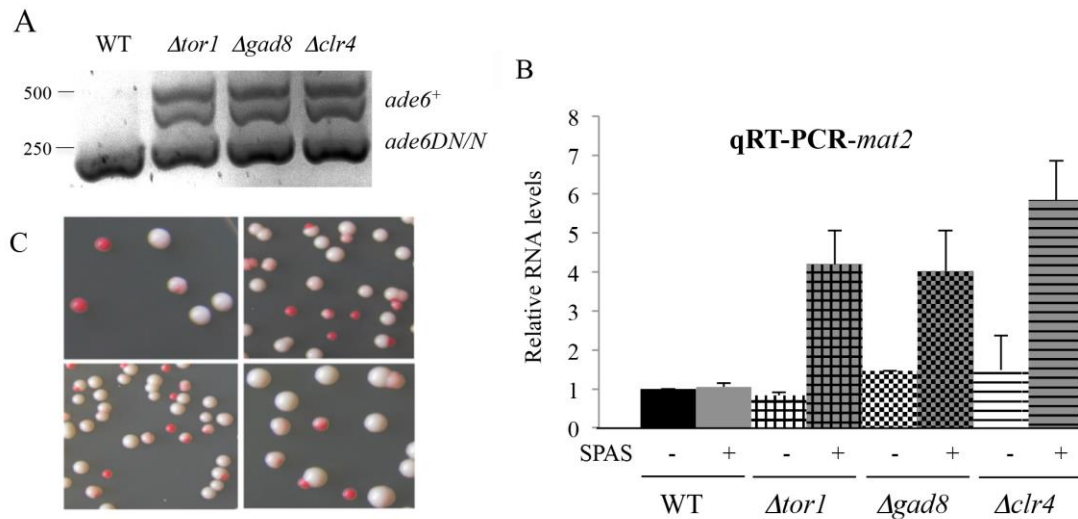

**Figure S1: The TORC2-Gad8 pathway promotes silencing at the mating-type region.** (A) Semi-quantitative RT-PCR analysis of the  $ade6^+$  gene inserted at the mating-type locus ( $mat2:BamHI::ade6^+$ ). A mini-  $ade6^+$  gene at the  $ade6^+$  locus ( $ade6-DN/N$ ) is used as internal controls.  $\Delta clr4$  cells are used for comparison (B) Loss of TORC2-Gad8 only weekly increases the endogenous  $mat2$  expression. Expression levels of  $mat2^+$  were examined in wild type (WT) or cells carrying mutations in  $\Delta tor1$ ,  $\Delta gad8$  or  $\Delta clr4$  cells with or without a five-hour shift to SPAS, a starvation medium that is used to induce cells into the sexual development pathway. (C)  $\Delta gad8$  cells display a highly variegated phenotype with respect to expression of the  $mat2:BamHI::ade6^+$  reporter gene.  $\Delta gad8$  cells carrying  $mat2:BamHI::ade6^+$  were spread on YE-Ade plates.

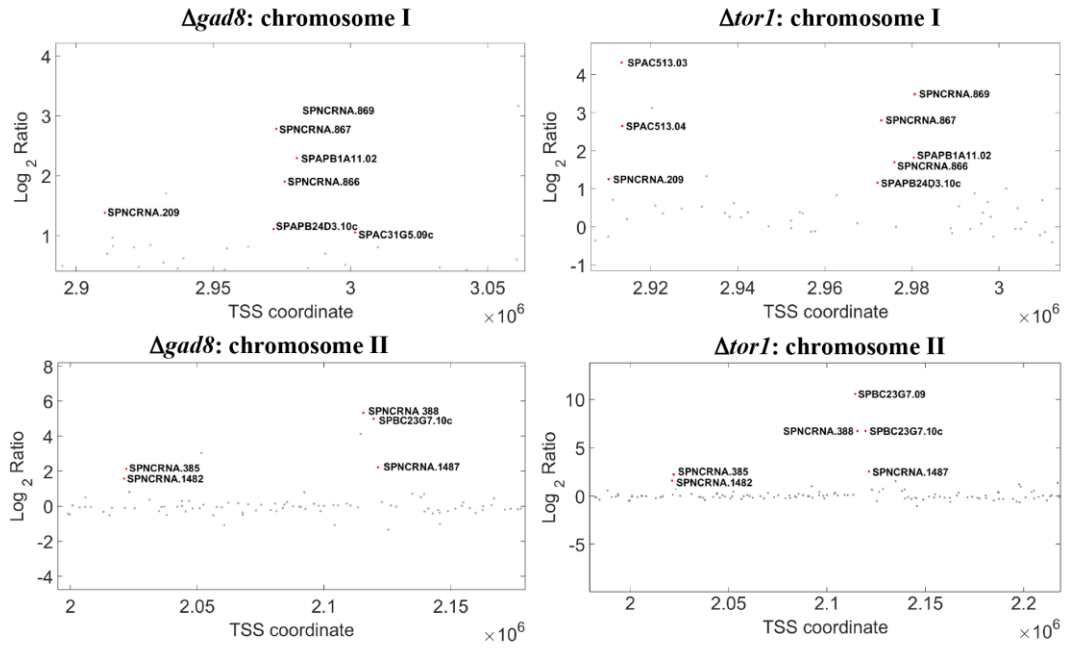

**Figure S2: TORC2-Gad8 affects gene expression at localized chromosomal regions outside the subtelomeric regions.** Magnification of the RNA-seq data for the regions indicated by blue arrows in Fig. 2 on the arms on chromosomes I and II that show clusters of upregulated genes in  $\Delta tor1$  and  $\Delta gad8$  mutant cells.

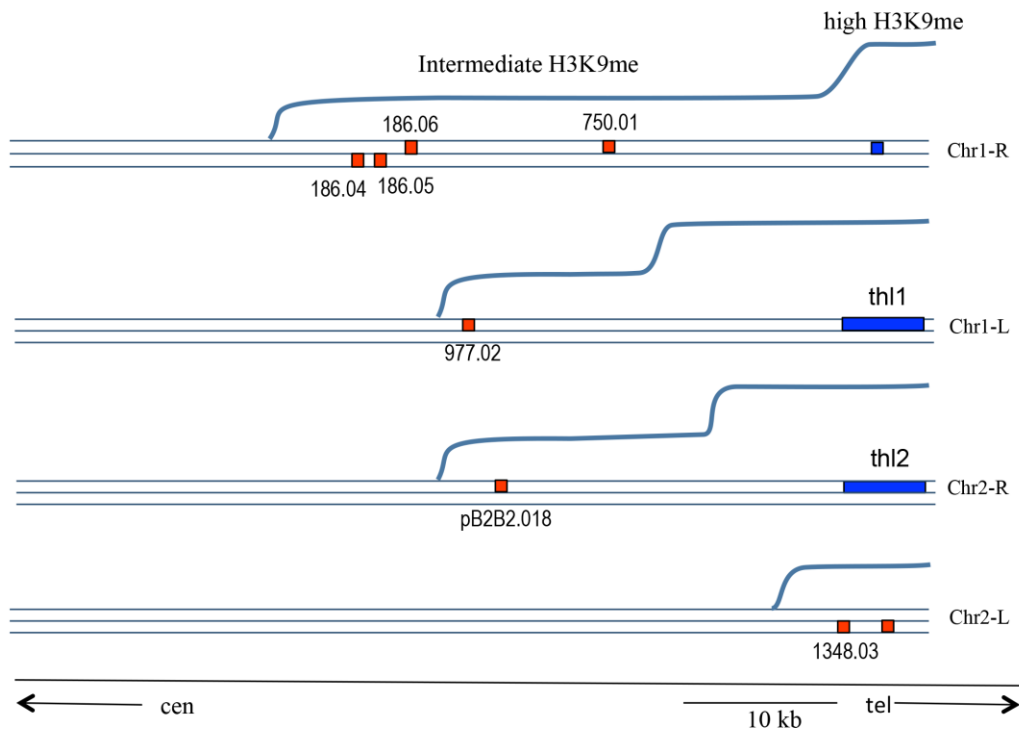

**Figure S3:** *Schematic representation of open reading frames within the subtelomeric regions of chromosome I and II.* Red boxes represent genes that are upregulated in  $\Delta tor1$  or  $\Delta gad8$  while blue boxes indicate genes that are unchanged or slightly reduced in gene expression according to RNA-seq analysis and qRT-PCR. Low and high H3K9me2 regions are represented according to (1) and following the scheme presented in (2).

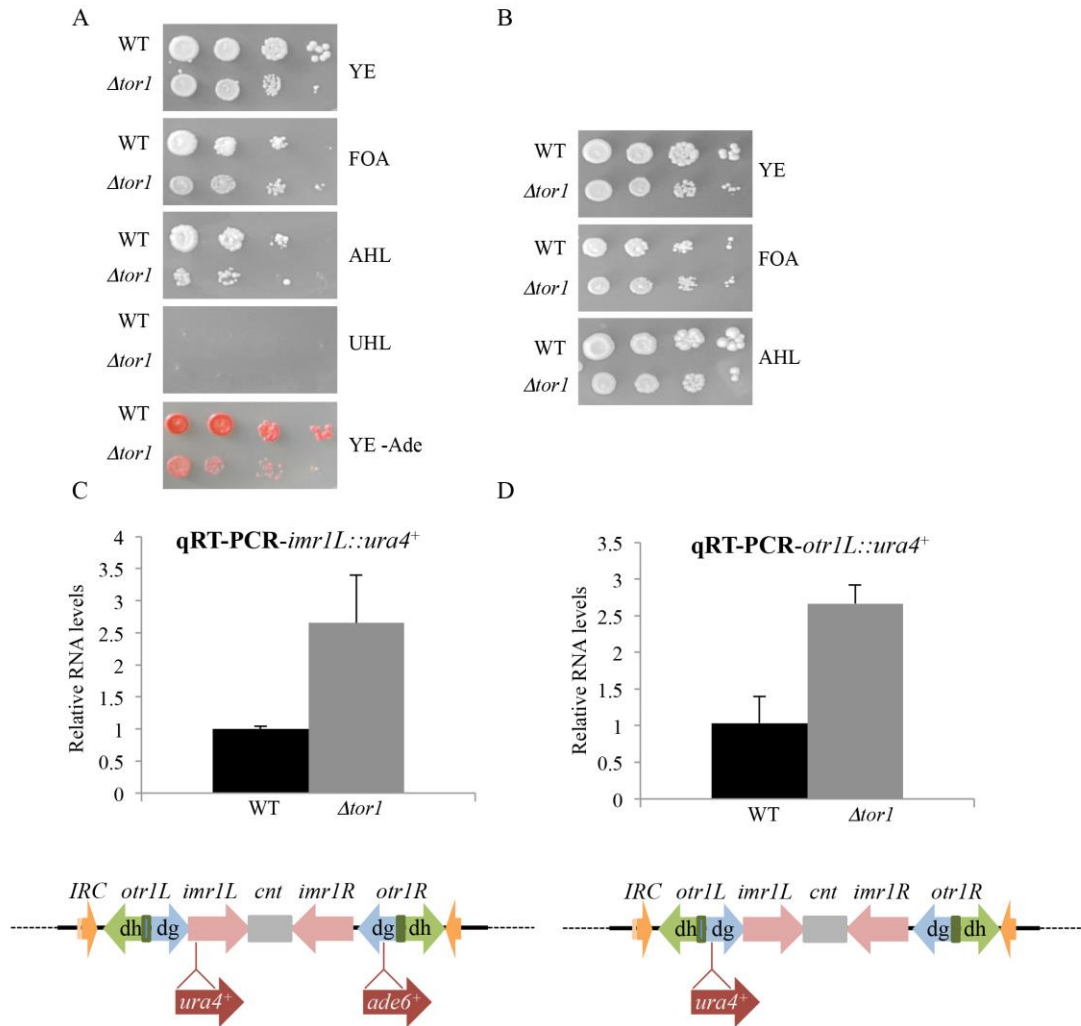

**Figure S4: TORC2-Gad8 is not required for heterochromatic gene silencing at the centromeric region.** (A-B) Silencing assays showing that Tor1 is not required for heterochromatic *ura4<sup>+</sup>* or *ade6<sup>+</sup>* gene silencing. (C-D) qRT-PCR analysis showing that the level of *imr1L::ura4<sup>+</sup>* or *otr1L::ura4<sup>+</sup>* is only slightly induced in  $\Delta tor1$  mutant cells.

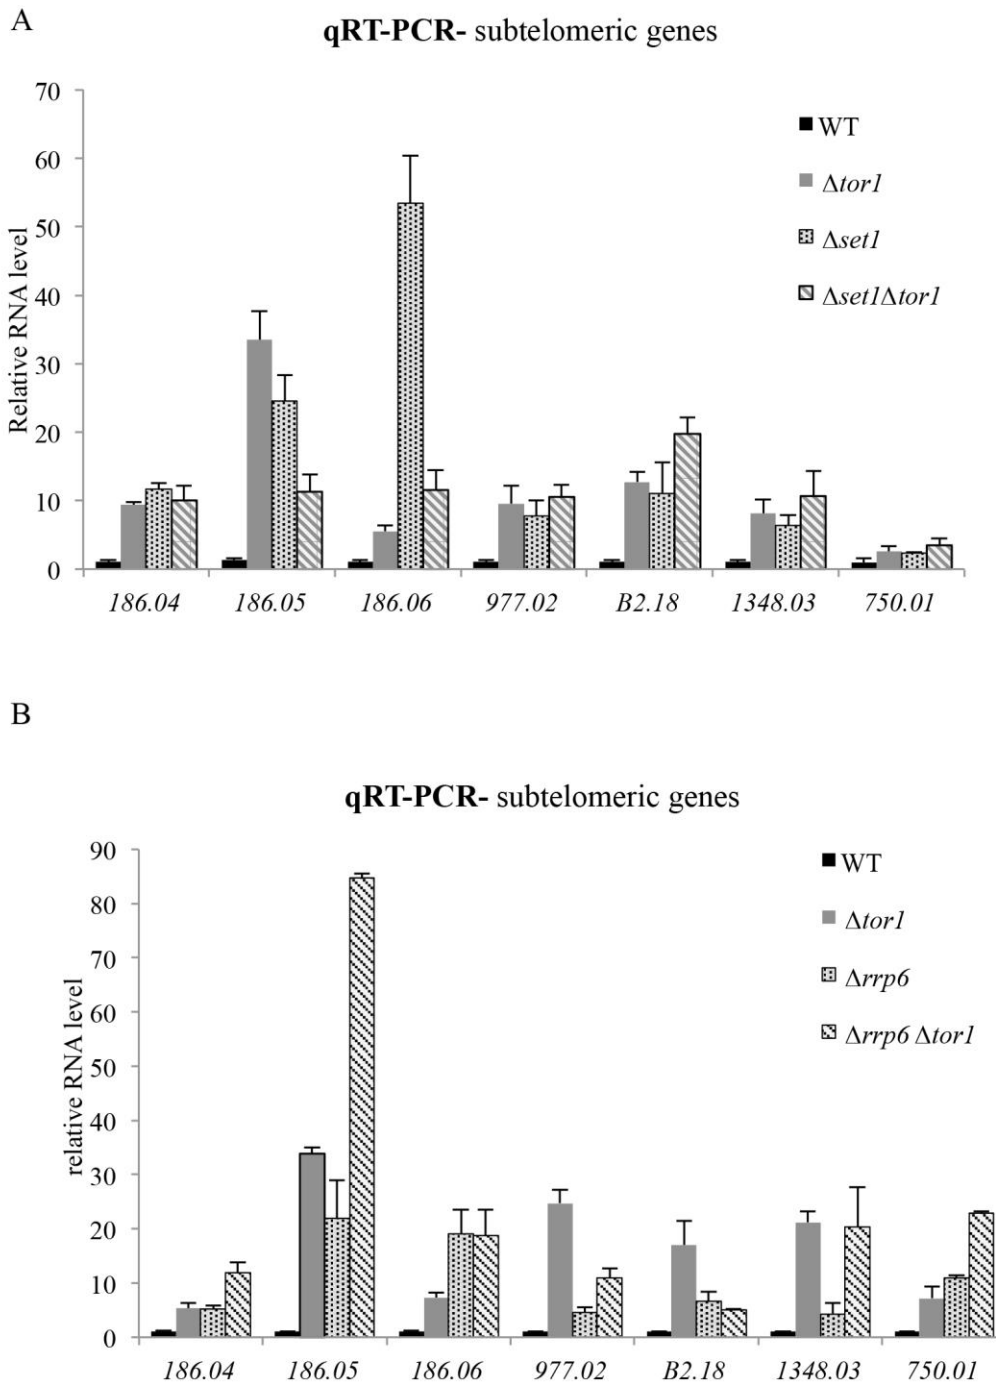

**Figure S5: The silencing defect in  $\Delta tor1$  is epistatic with disruption of  $set1^+$  but not with disruption of  $rrp6^+$ .** Expression levels of the indicated genes were determined by qRT-PCR as described in Fig. 3.

**Table S1:** Strains used in this study.

| Strain | Genotype                                                                                                             | Source           |
|--------|----------------------------------------------------------------------------------------------------------------------|------------------|
| TA1    | 975 <i>h</i> <sup>+</sup>                                                                                            | Laboratory stock |
| TA2    | <i>h</i> <sup>-</sup> <i>leu1-32 ura4-D18 ade6-M210</i>                                                              | Laboratory stock |
| TA16   | <i>h</i> <sup>90</sup> <i>leu1-32 ura4-D18 ade6-M216</i>                                                             | Laboratory stock |
| TA101  | <i>h</i> <sup>-</sup> <i>tor1::ura4<sup>+</sup> leu1-32 ura4-D18 ade6-216</i>                                        | Laboratory stock |
| TA390  | <i>h</i> <sup>-</sup> <i>tor1::ura4<sup>+</sup> ura4-D18</i>                                                         | Laboratory stock |
| TA910  | <i>h</i> <sup>+</sup> <i>set1::kanMX6 leu1-32 ura4-D18</i>                                                           | YGRC             |
| TA914  | <i>h</i> <sup>-</sup> <i>sin1::kanMX6 leu1-32 ura4-D18</i>                                                           | K. Shiozaki (3)  |
| TA956  | <i>mat1Msmt0 (BamHI)::ade6<sup>+</sup> leu1-32 ura-D18 ade6-210 his2</i>                                             | A. Cohen (4)     |
| TA972  | <i>mat1Msmt0 (BamHI)::ade6<sup>+</sup> tor1::ura4<sup>+</sup> leu1-32 ura4D-18<br/>ade6-M210 his2</i>                | This study       |
| TA1029 | <i>h</i> <sup>-</sup> <i>gad8::ura4<sup>+</sup> leu1-32 ura4-D18 ade6-M216</i>                                       | M. Yamamoto (5)  |
| TA1091 | <i>h</i> <sup>+</sup> <i>tor1:: ura4<sup>+</sup> set1::kanMX6 leu1-32 ura-D18</i>                                    | Laboratory stock |
| TA1114 | <i>h</i> <sup>-</sup> <i>ste20::kanMX6 leu1-32 ura4-D18</i>                                                          | K. Shiozaki (3)  |
| TA1128 | <i>mat1Msmt0 (BamHI)::ade6<sup>+</sup> sin1::kanMX6 leu1-32<br/>ura4-D18 ade6-M210 his2</i>                          | This study       |
| TA1132 | <i>h</i> <sup>+</sup> <i>gad8::ura4<sup>+</sup> ura4-D18</i>                                                         | Laboratory stock |
| TA1146 | <i>h</i> <sup>-</sup> <i>rrp6::kanMX6 leu-32 ura4-D18 ade6-M210</i>                                                  | S. Whitehall (6) |
| TA1164 | <i>mat1Msmt0 (BamHI)::ade6<sup>+</sup> ste20::kanMX6 leu1-32<br/>ura4-D18 ade6-M210 his2</i>                         | This study       |
| TA1168 | <i>mat1Msmt0 (BamHI)::ade6<sup>+</sup> gad8::ura4<sup>+</sup> leu1 ura4-D18<br/>ade6-M210 his2</i>                   | This study       |
| TA1231 | <i>h</i> <sup>-</sup> <i>clr4::Nat leu1-32 ura4-D18 ade6-210 his3D arg3-D</i>                                        | R. Allshire (7)  |
| TA1258 | <i>mat1Msmt0 (BamHI)::ade6<sup>+</sup> epe1::KanMX6 leu1-32 ura4D-18<br/>ade6-210</i>                                | This study       |
| TA1263 | <i>mat1-Msmt0 (BamHI)::ade6<sup>+</sup> otr1 (dh/BglII)::ura4<sup>+</sup> leu1-32<br/>ura4-DS/E ade6-210 his1989</i> | A. Cohen         |
| TA2008 | <i>h</i> <sup>90</sup> <i>ryh1::KanMX leu1-32 ura4-D18 ade6</i>                                                      | Laboratory stock |
| TA2127 | <i>Mat1Msmt0 (BamHI)::ade6<sup>+</sup> clr4:: KanMX leu1-32 ura4-D18<br/>Ade6DN/N</i>                                | This study       |
| TA2959 | <i>h</i> <sup>+</sup> <i>tor1::ura4<sup>+</sup> rrp6:: KanMX leu1-32 ura4-D18 ade6-216</i>                           | This study       |

TORC2-Gad8 promotes gene silencing

|        |                                                                                                                            |                  |
|--------|----------------------------------------------------------------------------------------------------------------------------|------------------|
| TA2997 | <i>mat1Msm0 (BamHI)::ade6<sup>+</sup> leu1:: KanMX leu1-32 ura4 ade6-210</i>                                               | This study       |
| TA3017 | <i>mat1Msm0 (BamHI)::ade6<sup>+</sup> leu1:: KanMX tor1::ura4<sup>+</sup> leu1-32 ura4 ade6-210</i>                        | This study       |
| TA3018 | <i>mat1Msm0 (BamHI)::ade6<sup>+</sup> leu1:: KanMX gad8::ura4<sup>+</sup> leu1-32 ura4-DS/E or D18 ade6-210 his2</i>       | This study       |
| TA3022 | <i>mat1Msm0 (BamHI)::ade6<sup>+</sup> epe1:: KanMX tor1::ura4<sup>+</sup> leu1-32 ura4-D18 ade6-210</i>                    | This study       |
| TA3033 | <i>h<sup>+</sup> paf1::kanMX4 leu1-32 ura4-DS/E ade6 his?</i>                                                              | This study       |
| TA3073 | <i>h<sup>90</sup> tor1::ura4<sup>+</sup> paf1::KanMX6 leu1-32 ura4 ade6 his2</i>                                           | This study       |
| TA3194 | <i>mat1Msm0 (BamHI)::ade6<sup>+</sup> sir2:: KanMX6 leu1-32 ura4-D18 ade6-210</i>                                          | This study       |
| TA3201 | <i>h<sup>90</sup> Swi6-5XFlag::hphMX6 leu1-32 ura4-D18 ade6-M216</i>                                                       | This study       |
| TA3222 | <i>h<sup>90</sup> tor1::ura4<sup>+</sup> Swi6-5XFlag::hphMX6 leu1-32 ura4-D18 ade6</i>                                     | This study       |
| TA3224 | <i>h<sup>90</sup> gad8::ura Swi6-5XFlag::hphMX6 leu1-32 ura4-D18 ade6</i>                                                  | This study       |
| TA3227 | <i>h<sup>90</sup> clr4: Nat Swi6-5XFlag::hphMX6 leu1-32 ura4-D18 ade6</i>                                                  | This study       |
| TA3234 | <i>h<sup>90</sup> epe1::kanMX6 leu1-32 ura4-D18 ade6-M216</i>                                                              | This study       |
| TA3238 | <i>h<sup>90</sup> tor1::ura4 epe1:: KanMX leu1-32 ura4-D18 ade6-M216</i>                                                   | This study       |
| TA3240 | <i>h<sup>90</sup> tor1::ura4<sup>+</sup> leu1-32 ura4-D18 ade6-216</i>                                                     | Laboratory stock |
| TA3275 | <i>h<sup>+</sup> imr1L(NcoI)::ura4<sup>+</sup> otr1R (SphI)::ade6<sup>+</sup> leu1-32 ura4-DS/E ade6-M210</i>              | S. Braun         |
| TA3287 | <i>h<sup>+</sup> imr1L(NcoI)::ura4<sup>+</sup> otr1R (SphI)::ade6 tor1:: kanMX leu1-32 ade6-M210 ura4-DS/E</i>             | This study       |
| TA3293 | <i>mat1-Msm0 (BamHI)::ade6<sup>+</sup> otr1 (dh/BglII)::ura4<sup>+</sup> tor1:: KanMX6 leu1-32 his2 ura4-DS/E ade6-210</i> | This study       |

\*YGRC Yeast Genetic Resource Center, Japan

**Table S2:** Oligonucleotides used for qRT-PCR analyses



## TORC2-Gad8 promotes gene silencing

| Name                | Target             | Sequence                            |
|---------------------|--------------------|-------------------------------------|
| #481 mat2-Pc R      | <i>mat2-Pc</i>     | TGTTAGACTTGCCTGGTCACAAT<br>T        |
| #480 mat2-Pc F      | <i>mat2-Pc</i>     | TTGAATATAGTATGCGCTCTAAC<br>TTGG     |
| #916 ADE6 F         | <i>ade6</i>        | GCAGTTTAGACGGAAAAGTTTA<br>TGC       |
| #917 ADE6 R         | <i>ade6</i>        | ATTGAGAAGGGAAGCGAGCAGG              |
| #994 ACT1 F         | <i>act1</i>        | GGTTTCGCTGGAGATGATG                 |
| #995 ACT1R          | <i>act1</i>        | ATACCACGCTTGCTTTGAG                 |
| #1220 TLH1/2 F      | <i>tlh1/2</i>      | ATGGTCGTCGCTTCAGAAATTGC             |
| #1221 TLH1/2 R      | <i>tlh1/2</i>      | CTCCTTGGAAGAATTGCAAGCCT<br>C        |
| #1238 MEI4 F        | <i>mei4</i>        | TCAGATCCGTGGAATCCTTC                |
| #1239 MEI4 R        | <i>mei4</i>        | CGCACTTGAGTAGCCACTTG                |
| #1242 SPAC186.05 F  | <i>SPAC186.05</i>  | AAATTTTCCCGGGCTTTCAT                |
| #1243 SPAC186.05 R  | <i>SPAC186.05</i>  | TCCGACAATCACCGCTACC                 |
| #1260 SPBC1348.03 F | <i>SPBC1348.03</i> | ACCAAGACTAAGCCTCACAGTG<br>AAATATTGT |
| #1261 SPBC1348.03 R | <i>SPBC1348.03</i> | CTACGACGCATCCAAATGTAAA<br>GGATC     |
| #1262 SPAC977.02 F  | <i>SPAC977.02</i>  | ACCAAGACTAAGCCTCACAGTG<br>AAATATTGT |
| #1263 SPAC977.02 R  | <i>SPAC977.02</i>  | ACTACGACGCATCCAAATGTAA<br>AGGATC    |
| #1264 SPAC750.01 F  | <i>SPAC750.01</i>  | TATTGGGAAGACTGGGTGCTTG<br>AAGA      |
| #1265 SPAC750.01 R  | <i>SPAC750.01</i>  | CCAACCAATTCTTCTGACACCCC<br>A        |
| #1266 SPBPB2B2.18 F | <i>SPBPB2B2.18</i> | GTTGTTCTCAGTGTGACTGGCAC<br>GA       |

|                     |                    |                                |
|---------------------|--------------------|--------------------------------|
| #1267 SPBPB2B2.18 R | <i>SPBPB2B2.18</i> | TGAGATTCGGGACTAGCATCGG<br>TAAT |
| #1271 SPAC186.04 F  | <i>SPAC186.04</i>  | GCGAAGAAAACCCAACAAGC           |
| #1272 SPAC186.04 R  | <i>SPAC186.04</i>  | TCATCGTTTACTCTGATCCGTGA        |
| #1273 SPAC186.06 F  | <i>SPAC186.06</i>  | GGGAGTGGAGCTGGATCAGT           |
| #1274 SPAC186.06 R  | <i>SPAC186.06</i>  | CGCCACCAACATGAATATCG           |
| #1279 <i>dg1</i> F  | <i>dg1</i>         | ACGGCATCGCTTGTACTTTT           |
| #1280 <i>dg1</i> R  | <i>dg1</i>         | TGAGGTTTCATGATGGGTTCA          |
| #1382 URA4 F        | <i>ura4</i>        | GTCGAGGATTTTCGACCAGGATA        |
| #1383 URA4 R        | <i>ura4</i>        | GCTTGACGGTATTTCCAATGTCT        |

1. Cam, H. P., Sugiyama, T., Chen, E. S., Chen, X., FitzGerald, P. C., and Grewal, S. I. (2005) Comprehensive analysis of heterochromatin- and RNAi-mediated epigenetic control of the fission yeast genome. *Nature genetics* **37**, 809-819
2. Dheur, S., Saupe, S. J., Genier, S., Vazquez, S., and Javerzat, J. P. (2011) Role for cohesin in the formation of a heterochromatic domain at fission yeast subtelomeres. *Molecular and cellular biology* **31**, 1088-1097
3. Ikeda, K., Morigasaki, S., Tatebe, H., Tamanoi, F., and Shiozaki, K. (2008) Fission yeast TOR complex 2 activates the AGC-family Gad8 kinase essential for stress resistance and cell cycle control. *Cell Cycle* **7**, 358-364
4. Ayoub, N., Goldshmidt, I., and Cohen, A. (1999) Position effect variegation at the mating-type locus of fission yeast: a cis-acting element inhibits covariegated expression of genes in the silent and expressed domains. *Genetics* **152**, 495-508
5. Matsuo, T., Kubo, Y., Watanabe, Y., and Yamamoto, M. (2003) *Schizosaccharomyces pombe* AGC family kinase Gad8p forms a conserved signaling module with TOR and PDK1-like kinases. *The EMBO journal* **22**, 3073-3083
6. Anderson, H. E., Wardle, J., Korkut, S. V., Murton, H. E., Lopez-Maury, L., Bahler, J., and Whitehall, S. K. (2009) The fission yeast HIRA histone chaperone is required for promoter silencing and the suppression of cryptic antisense transcripts. *Molecular and cellular biology* **29**, 5158-5167
7. Ekwall, K., Nimmo, E. R., Javerzat, J. P., Borgstrom, B., Egel, R., Cranston, G., and Allshire, R. (1996) Mutations in the fission yeast silencing factors *clr4+* and *rik1+* disrupt the localisation of the chromo domain protein Swi6p and impair centromere function. *Journal of cell science* **109** ( Pt 11), 2637-2648
